# Supplementary material
Source: publisher figshare collection journal article supplement (https://sage.figshare.com/ndownloader/files/19965635)
Supplement: Supplementary file 1 [file 19965635]

### **Annexure: Description of Variables**

1. Socio economic status (SES): An index was created for SES using data reduction techniques.
2. Welfare: Total expenditure of the household used to measure welfare of the worker (consumption approach).
3. Number of household members: Number of people living in the household of the respondent.
4. Age: Age of the respondent and the members of the household in completed years.
5. Education: A categorical variable representing the education level of the respondent and household members.
6. Gender: Dummy variable.
7. Number of Rooms: Number of rooms available in the house.
8. Number of household earners: Earning members of the household of the respondent.
9. Land ownership: A binary variable stating whether the respondent possesses any form of land.
10. Livestock ownership: Current market value of the livestock owned by the respondent.
11. Toilet facility: A categorical variable where a higher value indicates better toilet facility available in the house.
12. Household assets: A binary variable (yes/no) representing ownership of 14 listed assets such as TV, bicycle etc.
13. Total household expenditure: Sum of expenditure on food, health, education, and others.
14. Loan: A binary variable indicating whether or not the respondent of family has taken a loan.
15. Experience: The number of years the respondent has been working with the firm.
16. Wages: Wage of the respondent.
17. Side Business: A binary variable indicating whether or not the respondent has a side business besides job in the factory.
18. Family size: Total number of members in a household living together.
19. Dependency ratio: Using three age categories, this is computed as a ratio of the dependent age group over the earning age group.
20. Worker label: A binary variable with a value of one denoting that worker is working with certified producer.

Figure A Graphical representation of the common support for the variables of interest.

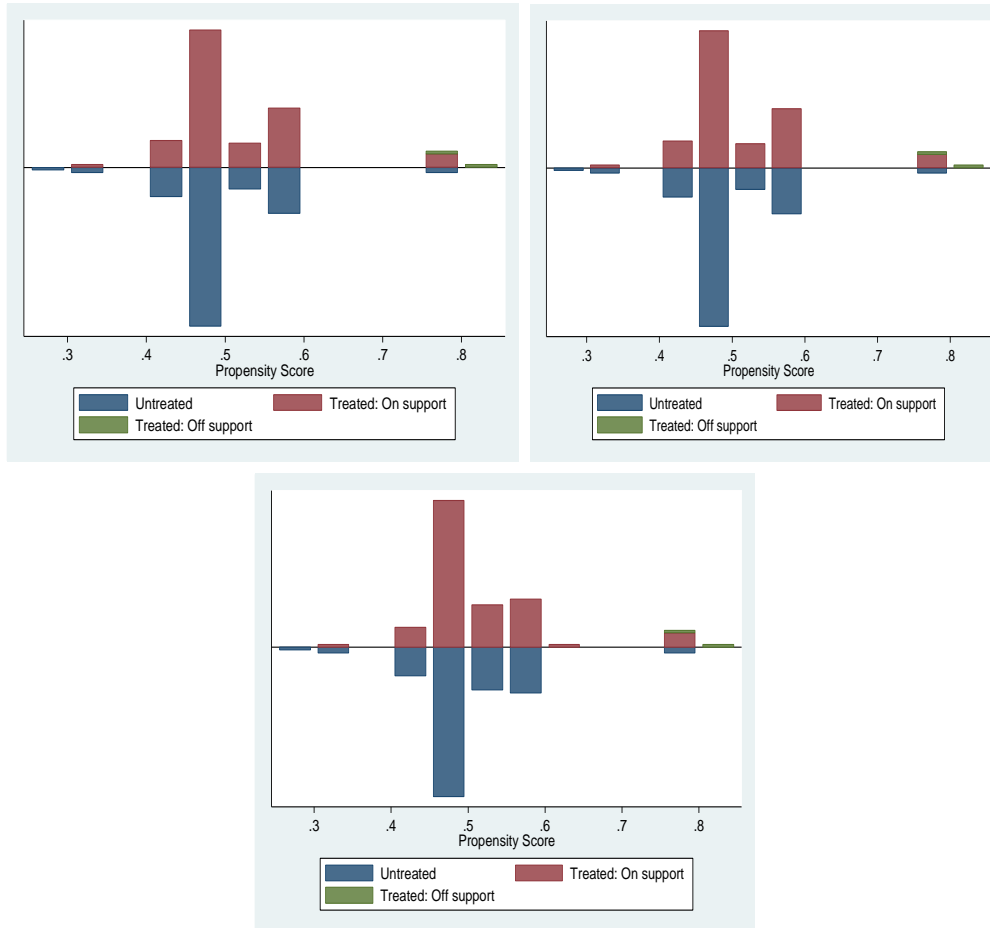

Figure A1.1 Socio Economic Status (SES)

Figure A1.2 Total Expenditure

Figure A1.3 Total Expenditure (Food)

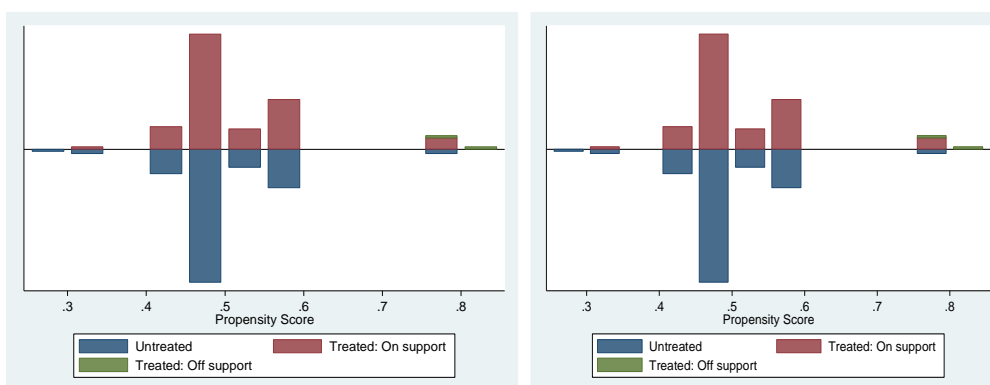

Figure A1.4 Total Expenditure (Health)

Figure A1.5 Total Expenditure

(Education)

Table 3: Summary Statistics

|                   | W=0                 | W=1                 |                       |
|-------------------|---------------------|---------------------|-----------------------|
|                   | Mean                | Mean                | Diff. in Mean         |
| Experience        | 10.34<br>(-0.74)    | 10.12<br>(0.75)     | 0.225<br>(1.05)       |
| Wage              | 14267.4<br>(326.6)  | 14758.8<br>(323.5)  | 491.39<br>(459.7)     |
| Gender            | 0.98<br>(0.014)     | 0.93<br>(0.026)     | 0.05<br>(0.029*)      |
| Per Capita Income | 3535.3<br>(173.93)  | 3176.9<br>(152.23)  | 358.4<br>(231.13)     |
| Age               | 41.78<br>(1.098)    | 42.5<br>(0.714)     | -0.72<br>(1.309)      |
| Mean Education    | 1.89<br>(0.761)     | 1.795<br>(0.07)     | 0.099<br>(0.099)      |
| Side Business     | 0.25<br>(0.044)     | 0.32<br>(0.047)     | -0.07<br>(0.064)      |
| Dep. Ratio        | 1.29<br>(0.253)     | 1.09<br>(0.134)     | 0.196<br>(0.286)      |
| Family Size       | 6.35<br>(0.179)     | 6.81<br>(0.184)     | 0.46*<br>(0.256)      |
| No. of Rooms      | 2.67<br>(0.162)     | 2.52<br>(0.120)     | 0.15<br>(0.201)       |
| Livestock         | 10403.0<br>(3620.6) | 24855.0<br>(6197.7) | 141452.0*<br>(7177.8) |
| T. Facility       | 2.95<br>(0.098)     | 2.80<br>(0.099)     | 0.15<br>(0.139)       |
| Asset Index       | 0.39<br>(0.010)     | 0.405<br>(0.011)    | 0.014<br>(0.015)      |
| Loans             | 0.54<br>(0.050)     | 0.61<br>(0.049)     | 0.07<br>(0.07)        |
| T. Expenditure    | 19146.5<br>(635.01) | 18875.0<br>(599.81) | 271.5<br>(873.5)      |
| Food Exp.         | 12165.0<br>(481.01) | 11240.0<br>(477.07) | 925.0<br>(677.47)     |
| Health Exp.       | 779.5<br>(77.22)    | 981.0<br>(87.48)    | 201.5*<br>(116.69)    |
| Edu.Exp.          | 3042.0<br>(166.78)  | 3898.0<br>(214.01)  | 856.0***<br>(271.32)  |
